# Supplementary material for: Osteopontin-integrin interaction as a novel molecular target for antibody-mediated immunotherapy in adult T-cell leukemia
Source: PubMed Central journal article supplement (PMC4657376; doi:10.1186/s12977-015-0225-x), 2015-11-24

**Figure S3**

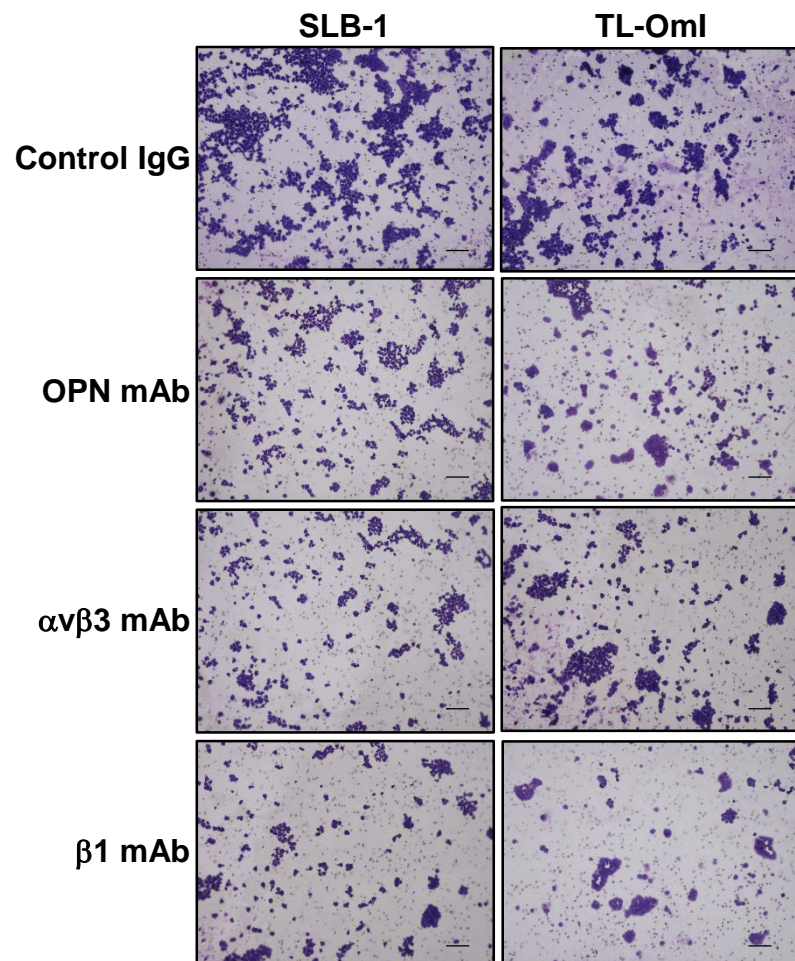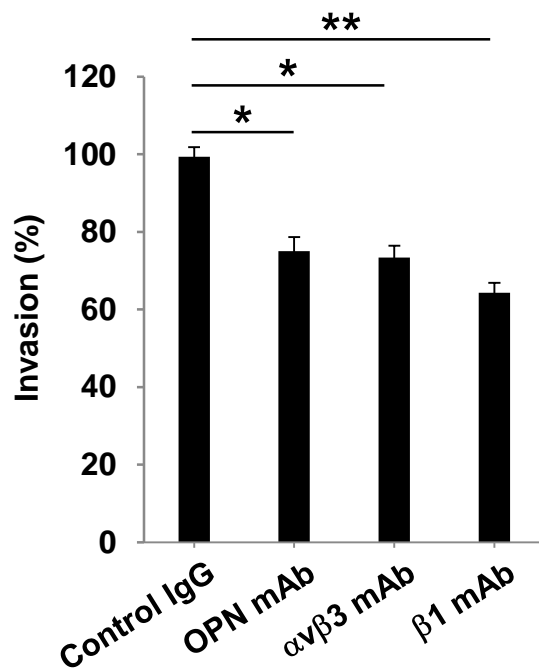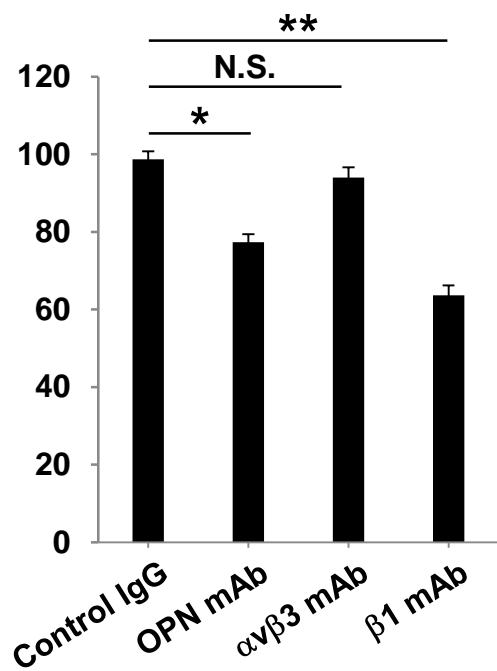

Supplement: 12977_2015_225_MOESM4_ESM.pdf [file 12977_2015_225_MOESM4_ESM.pdf]
